# Supplementary material for: A cross-sectional study on perceptions towards safe disposal of unused/expired medicines and its associated factors among the public in Saudi Arabia—a threat to the environment and health
Source: PeerJ journal article supplement (doi:10.7717/peerj.19258), 2025-04-23
Supplement: Data.xlsx [file Data.xlsx]

## Sheet: Form Responses 1
1 - Gender	2 - Age in years	3 - Marital status	4 - Education	5 - Occupation	6 - Are there any unused medicines at your home?	7 - What might be the possible reasons for the availability of unused medicines at home?	8 - Do you know about the proper method for medication disposal?	9 - Which type of medicine did you dispose of recently?	10 - How do you dispose your unused or expired medicines?	11 - Do you think unused/expired medicines at home are potentially risks for the community?	12 - Do you think unsafe drug disposal practices pose a threat to our environment?	13 - Do you think there is lack of adequate information on safe disposal of unused and expired household medicines?	14 - Do you think public must be sensitized about the impact of unsafe disposal practices?	15 - Do you realize that the issue of mediciation disposal is of immediate public health importance?	16 - How can we minimize or control the hazardous effects of unused or expired medicines?	17 - What measure do you suggest for consumer awaerness about proper drug disposal?	18 - Which of the following can be utilized most effectively in creating awareness among the community regarding proper drug disposal?
1	1	1	3	2	1	2	0	6	2	2	2	2	2	2	1	4	2
1	3	2	3	3	0	2	0	1 , 2	2	2	2	2	2	2	2	2	1
1	2	1	3	3	1	3	1	1 , 2 , 4	3	2	2	1	2	1	3	2	1
1	2	2	3	3	1	2	0	1	2	2	2	2	2	2	3	2	1
1	1	1	3	1	1	2	0	1	2	2	2	2	2	2	3	4	2
1	2	2	3	3	1	2	1	1 , 2	2	2	2	2	2	2	1	2	2
2	1	1	3	2	1	2	0	1 , 2	2	2	2	2	2	2	3	3	1
1	1	1	3	2	1	2	1	2	2	2	2	2	2	2	1	2	1
1	2	2	3	3	1	2	0	1	2	2	2	2	2	2	3	3	1
2	1	1	2	2	1	3	0	1 , 2 , 4,5	2	2	2	2	2	2	3	1	2
2	1	1	3	2	1	2	0	3, 1, 6	2	1	1	2	2	2	1	2	1
2	1	1	2	2	1	2	0	3, 6, 2	2	2	2	2	2	2	2	2	1
2	1	1	3	2	1	2	0	1 , 2	2	1	2	2	2	2	3	2	1
2	3	2	2	1	0	2	0	3, 1	2	2	2	2	2	2	1	1	2
1	1	1	2	2	1	6	0	1 , 2	2	2	2	2	2	2	1	4	1
2	1	1	3	2	1	1	0	2	2	2	2	2	2	2	4	3	2
2	1	1	2	2	0	6	0	3	2	2	2	2	2	2	2	3	1
2	1	1	3	2	1	2	0	2	2	2	2	2	2	2	2	3	1
2	1	1	2	2	1	2	0	1 , 2	2	1	2	2	2	2	1	3	1
2	1	1	3	2	1	2	0	3	1	2	2	2	2	2	1	2	2
2	1	1	2	2	1	1	0	3, 1	2	2	2	2	2	2	1	3	1
2	2	1	3	5	1	2	0	6, 2	2	1	1	2	2	2	1	2	1
1	1	1	3	2	1	3	0	3, 1, 6, 2, 4,5	2	2	2	2	2	2	1	2	3
1	1	1	3	2	1	4	1	3, 1, 6	2	2	2	2	2	2	1	4	2
2	3	2	2	3	1	2	0	6	2	2	2	2	2	2	1	3	1
2	1	1	2	2	1	3	0	1	2	1	2	2	2	2	3	2	1
1	2	1	3	2	0	2	1	1	2	2	2	1	2	2	3	1	1
2	1	1	3	2	1	2	0	1	2	2	1	2	2	2	3	3	2
1	1	1	3	2	1	6	0	1	2	2	2	2	2	2	3	2	2
2	2	1	3	2	1	2	0	1, 4,5	1	2	2	2	2	2	4	4	2
1	1	1	2	2	1	2	0	1 , 2,5	2	1	2	2	2	2	1	4	2
1	2	2	3	3	1	2	1	1	2	2	2	2	2	2	3	4	2
1	3	1	3	3	1	2	0	6	2	2	2	2	2	2	1	2	1
2	1	1	3	2	1	2	0	1, 6, 2	2	2	2	2	2	2	3	4	2
2	2	1	3	5	1	6	1	1	2	2	2	2	2	2	1	3	1
1	2	1	3	1	1	6	0	6, 2,5	2	2	2	2	2	2	3	2	1
1	3	2	3	3	1	5	0	3	2	2	2	2	2	2	1	2	2
2	1	1	2	2	1	2	0	1, 6	2	2	2	2	2	2	3	3	1
2	2	1	3	5	0	5	1	2	5	2	2	2	2	2	1	3	1
2	1	1	3	2	0	2	0	2	2	2	2	2	2	2	3	4	2
2	1	1	3	2	1	2	0	1 , 2	2	2	2	2	2	2	3	1	2
2	1	1	3	2	1	2	0	3, 1, 6, 2, 4,5	2	2	2	2	2	2	1	2	2
1	2	2	3	3	1	2	0	1 , 2	2	2	2	2	2	1	1	3	1
1	2	2	3	3	0	2	0	2	2	2	2	2	2	2	1	2	1
1	1	1	3	2	1	2	0	1 , 2	2	2	2	2	2	2	1	2	1
2	2	2	3	5	1	2	1	3, 1	2	2	2	2	2	2	1	4	2
1	2	1	3	2	1	1	0	1 , 2	2	2	2	2	2	2	1	2	2
2	1	1	3	2	1	2	0	1 , 2	2	2	2	2	2	2	3	4	2
1	1	1	3	1	1	2	0	1 , 2	1	2	2	2	2	2	3	2	1
1	3	2	3	3	1	2	0	6, 2	2	2	2	2	2	2	3	3	2
1	2	2	3	3	1	2	0	3, 1	2	2	2	2	2	2	1	4	2
2	1	1	3	2	1	2	0	1 , 2	2	2	2	2	2	2	1	3	1
1	2	1	3	2	1	2	0	3, 4	2	2	2	1	2	2	3	1	1
2	1	1	2	2	1	6	0	1	2	2	2	2	2	2	4	3	2
2	1	1	2	2	1	2	0	3, 1 , 2,5	4	2	2	2	2	2	3	3	2
2	2	1	3	5	1	2	0	1	2	2	2	2	2	2	1	1	2
1	1	1	3	2	1	2	0	3	2	2	2	2	2	2	1	3	2
2	1	1	3	2	1	2	0	1	2	2	2	2	2	2	3	2	2
1	2	2	3	3	1	6	0	6, 2	2	2	2	2	2	2	1	4	2
2	2	1	3	3	1	3	0	1, 6	2	2	2	2	2	2	1	1	1
2	1	1	2	2	1	2	0	6, 2	2	2	2	2	2	2	3	2	1
2	1	1	2	2	0	2	0	2	2	2	2	2	2	2	3	2	2
2	2	1	3	1	1	2	0	2	2	2	1	2	2	2	3	3	1
2	2	1	3	2	1	1	0	6	2	2	2	2	2	2	1	3	1
2	1	1	3	2	1	2	1	2	2	2	2	2	2	2	3	2	1
1	1	1	3	2	1	6	0	3, 1	2	2	2	2	2	2	1	4	2
2	1	1	2	2	1	2	0	6	2	2	2	2	2	2	4	4	1
1	3	2	2	5	1	2	0	3, 1 , 2	2	2	2	2	2	2	1	1	2
2	1	1	3	2	1	6	0	2	2	2	2	2	2	2	1	2	1
2	1	1	3	2	1	2	0	3	2	2	2	2	2	2	1	2	1
1	3	2	2	5	0	2	0	3, 4	2	2	2	2	2	2	3	1	3
2	1	1	2	2	1	2	0	3	2	2	2	2	1	2	2	2	1
1	1	1	3	2	0	2	0	1	2	2	2	2	2	2	1	4	2
2	2	1	3	5	0	2	0	1	2	2	2	2	2	2	1	3	1
2	1	1	2	2	0	7	0	1	2	1	2	1	2	2	3	2	1
2	1	1	3	2	1	2	0	1	2	2	2	2	2	2	1	3	1
2	1	1	3	2	1	2	1	1 , 2	2	2	2	2	2	2	1	3	1
1	4	2	3	3	1	5	0	6	2	1	2	2	2	2	1	1	2
1	1	1	2	2	1	3	1	,5	1	2	2	2	2	2	3	4	2
2	1	1	2	2	1	3	0	2	2	2	2	2	2	2	3	2	1
2	1	1	2	2	0	2	1	6	2	1	2	2	2	2	3	2	2
2	2	1	3	2	1	6	0	1, 6	2	2	2	1	1	1	2	4	2
1	3	2	3	3	1	2	1	1	2	2	2	2	2	2	1	3	2
1	1	1	3	2	1	2	1	1, 6	2	2	2	2	2	2	3	2	1
2	1	1	3	2	1	2	0		2	2	2	2	2	2	2	1	2
2	1	1	3	5	1	6	1	6	2	2	2	2	2	2	3	4	2
1	1	1	2	2	1	1	0		2	1	1	2	2	2	1	3	1
1	2	1	3	1	1	1	0	3, 1, 6, 2	1	2	2	2	2	2	3	2	2
1	2	2	3	3	1	2	0	1 , 2	2	2	2	2	2	2	1	4	2
2	1	1	2	2	1	2	1	1, 6	2	2	2	2	2	2	3	2	1
2	2	2	3	5	1	2	0	1 , 2	2	2	2	2	2	2	1	1	2
1	2	2	3	3	1	2	0	1, 6	2	2	2	2	2	2	3	4	2
2	3	2	3	5	0	3	0	1	2	2	2	2	2	2	3	3	1
2	1	1	3	2	1	2	0	3, 1 , 2	2	2	2	2	2	2	3	2	1
1	2	2	3	1	1	2	0	2	2	2	2	2	2	2	1	2	2
1	2	2	3	3	1	2	0	3	2	2	2	2	2	2	3	2	2
2	1	1	3	2	1	2	0	1	2	2	2	2	2	2	1	2	1
2	1	1	3	2	1	2	0	4,5	2	1	2	2	2	2	1	3	1
2	1	1	3	1	1	2	0	1, 6	3	2	2	2	2	2	1	2	2
2	1	1	2	2	1	2	0	3	2	2	2	2	2	2	3	2	1
1	3	2	3	3	1	2	0	1	2	2	2	2	2	2	3	4	1
2	1	1	3	2	1	2	0	1, 6	2	2	2	2	2	2	3	4	1
1	2	1	3	3	0	2	0	2	2	2	2	2	2	2	3	4	2
1	4	2	2	5	1	7	0	6	2	2	2	2	2	2	1	3	2
1	2	1	2	1	1	2	0	2	2	2	2	2	2	2	3	2	1
2	4	1	3	3	1	3	0	1	2	2	2	2	2	2	2	3	1
2	1	1	2	2	1	2	0	1 , 2	2	2	1	2	2	2	1	3	2
2	1	1	2	2	1	3	0	1	2	1	2	2	2	2	3	2	1
1	3	2	3	3	0	2	1	2	1	2	2	2	2	2	3	4	2
2	1	1	2	5	1	6	0	2	2	2	2	2	2	2	1	2	1
1	2	2	3	2	1	2	0	1	2	2	2	2	2	2	3	2	1
1	1	1	3	5	0	1	0	1 , 2 , 4	2	2	2	2	2	2	3	3	1
1	2	1	3	1	1	2	0		2	2	2	2	2	2	3	3	2
1	1	1	2	2	1	2	0	3, 1 , 2	2	2	2	2	2	2	1	4	2
1	3	2	2	1	1	2	0	3	3	2	2	2	2	2	1	2	2
1	2	2	3	3	1	2	1	6	2	2	2	2	2	2	1	2	2
2	2	2	2	3	0	6	0	3, 1	2	2	2	2	2	2	1	2	1
1	1	1	3	2	1	7	0	6	3	1	2	2	2	1	1	3	1
2	1	1	2	2	1	2	0	1	2	2	2	2	2	2	3	4	2
1	2	2	3	3	0	6	0	3, 1, 6	2	2	2	2	2	2	1	4	2
1	1	1	3	2	1	2	0	1 , 2	3	2	2	2	2	2	3	4	1
2	2	2	3	2	1	2	0	1, 6, 2	2	2	2	2	2	2	3	2	1
1	2	1	2	2	1	3	1	3, 1 , 2	2	2	2	2	2	2	3	2	1
1	2	2	3	3	1	2	0	1, 6	2	2	1	2	2	2	3	4	2
2	1	1	3	2	1	6	0	1 , 2	2	2	2	2	2	2	1	1	1
2	1	1	3	2	0	2	0	1, 6	2	2	2	2	2	2	3	4	2
2	1	1	3	2	0	7	1	3	2	2	2	2	2	2	1	1	1
1	3	2	3	3	1	2	1	1	2	2	2	2	2	2	1	3	2
2	1	1	3	2	0	2	0	2	2	2	2	2	2	2	3	3	1
1	2	2	3	3	1	2	0	2	2	2	1	2	2	2	1	4	2
2	1	1	3	5	1	2	0	1 , 2	2	2	2	2	2	2	3	3	2
1	2	1	3	1	1	2	0	1	2	2	2	2	2	2	2	4	2
1	3	2	3	3	1	2	0	1	2	2	2	2	2	2	1	4	2
2	1	1	2	2	1	2	0	1	2	2	2	2	2	2	3	3	2
2	2	2	3	3	1	2	1	6	2	2	2	2	2	2	1	3	2
1	2	2	3	1	1	6	0	1, 6, 2	2	2	2	2	2	2	3	4	2
1	2	2	3	3	1	5	0	2	2	2	2	2	2	2	2	3	2
2	3	2	3	3	1	2	0	1 , 2	2	2	2	2	2	2	3	4	1
2	3	2	3	3	0	2	0	1	2	2	2	2	2	2	1	4	2
1	1	1	3	2	0	2	1	2	2	2	1	2	2	2	3	3	2
1	1	1	3	2	0	6	0	6	2	2	2	2	2	2	1	2	2
1	1	1	2	2	1	2	1	1	2	2	2	2	2	2	3	1	2
1	1	1	3	2	1	2	1	1	2	2	2	2	2	2	1	2	2
1	2	2	3	3	1	2	0	3	2	2	2	2	2	2	3	3	1
2	3	2	3	3	1	2	0	3, 1, 6	2	2	2	2	2	2	3	1	1
1	1	1	3	2	1	1	0	3, 1 , 2	2	1	1	2	2	2	1	3	1
2	3	2	3	3	0	7	0	3	2	2	2	2	2	2	1	2	2
1	2	1	3	5	1	2	0	3	2	2	2	2	2	2	3	1	1
1	2	1	3	3	0	2	0	2	2	2	2	2	2	2	3	3	2
1	1	1	3	2	1	2	0	3, 1 , 2	2	2	2	2	2	2	4	3	1
2	3	2	3	3	1	2	0	1	2	2	2	2	2	2	1	2	1
1	1	2	3	2	1	2	0	3, 1 , 2	2	2	2	2	2	2	3	4	2
1	3	2	3	3	1	2	0	3, 1 , 2	2	2	2	2	2	2	2	2	1
1	2	2	3	1	1	2	0	2	2	2	2	2	2	2	4	2	1
1	1	1	3	2	1	2	0	2	2	2	2	2	2	2	3	2	1
1	2	2	3	3	1	2	0	6	2	2	2	2	2	2	1	2	2
1	2	2	3	3	1	6	0	6	4	2	2	2	2	2	3	4	2
2	1	1	2	2	1	2	0	1 , 2	2	2	2	2	2	2	3	3	2
2	1	1	3	2	1	1	0	1	2	2	2	2	2	2	1	2	1
1	1	1	3	2	1	7	0	1	2	2	2	2	2	2	1	2	2
1	1	1	2	2	0	2	0	3, 1	2	2	2	2	2	2	1	3	2
1	2	1	3	3	0	6	0	3	2	2	2	2	2	2	1	2	1
2	2	2	3	3	1	6	0	2	2	2	2	2	2	2	1	3	1
1	2	1	3	5	1	2	0		2	2	2	2	2	2	1	3	2
1	2	2	3	2	1	2	0	1	2	2	2	2	2	2	3	2	1
1	1	1	3	2	1	2	0	3	2	2	2	2	2	2	3	2	1
1	1	1	3	2	1	2	0	1 , 2	5	2	2	2	2	2	1	4	2
1	1	1	3	2	1	2	0	2	2	2	2	2	2	2	3	2	1
2	2	2	3	3	1	2	1	1 , 2,	1	2	2	2	2	2	1	2	2
1	2	1	3	1	1	2	0	1 , 2	2	2	2	2	2	2	3	4	2
1	1	1	3	2	0	6	0	6	2	2	2	2	2	2	1	2	2
1	2	1	3	5	1	2	0	3	2	2	2	2	2	2	3	2	1
1	2	1	3	1	1	2	0	1 , 2	2	2	2	2	2	2	2	4	2
1	2	1	3	1	1	2	0	1 , 2	2	1	1	2	2	2	1	1	2
1	3	2	3	3	0	3	0		3	2	2	2	2	2	1	4	1
1	1	1	3	3	1	2	1	1 , 2	2	2	2	2	2	2	1	3	2
2	1	1	3	2	0	2	1	1	2	2	2	2	2	2	1	1	3
1	1	1	3	2	1	2	0	6	3	2	2	2	2	2	1	2	1
1	1	1	3	2	1	6	0	1	2	2	2	2	2	2	1	2	1
1	3	2	3	3	1	2	1	1 , 2	2	2	2	2	2	2	4	2	1
1	3	2	3	3	1	2	0	1	2	2	1	2	2	2	3	3	2
1	1	1	3	2	1	7	0	6	3	1	2	2	2	1	1	3	1
2	1	1	2	2	1	2	1	2	2	2	2	1	2	2	1	3	1
2	3	2	3	3	1	2	1	1	2	2	2	2	2	2	3	4	2
1	1	1	3	5	1	2	0	6, 2	2	2	2	2	2	2	3	1	1
2	1	1	3	2	1	2	0	1	2	2	2	2	2	2	4	4	2
1	2	1	3	1	1	2	1	3, 1, 6, 2	2	2	2	2	2	2	1	2	1
2	2	1	3	1	1	2	0	6, 2	2	2	2	2	2	2	3	3	1
1	1	1	3	2	1	2	0	1	4	2	2	2	2	2	1	2	2
2	2	1	3	2	1	1	0	6, 2,5	2	1	2	2	2	2	3	3	1
2	1	1	3	2	0	6	0	1 , 2	2	2	2	2	2	2	1	2	2
2	2	1	3	5	0	3	0	3, 1 , 2	2	2	2	2	2	2	3	2	2
1	1	1	2	2	0	2	1	5	1	2	2	1	2	2	3	4	1
2	1	1	3	2	1	2	0	1 , 2	2	2	2	2	2	2	3	2	1
2	1	1	3	2	1	2	0	1 , 2	2	2	2	2	2	2	3	3	1
1	1	1	3	2	1	6	1	1	2	2	2	2	2	2	2	1	3
2	1	1	2	2	1	2	0	3, 1	2	1	2	2	2	2	3	3	2
1	2	2	3	3	1	6	0	1	2	2	2	2	2	2	1	2	2
2	1	1	3	5	1	6	0	1 , 2	2	2	2	2	2	2	1	2	2
1	2	1	3	5	0	4	0	2	3	2	2	2	2	2	2	1	2
2	1	1	2	2	1	5	0	3, 1 , 2	2	2	2	2	2	2	3	2	2
1	1	1	3	2	0	1	1	1	2	2	2	2	2	2	2	2	2
1	2	1	3	1	1	2	0	2	2	2	2	2	2	2	1	4	2
1	1	1	2	2	1	2	0	1, 6, 2, 4,5	2	2	2	2	2	2	1	1	1
2	1	1	3	2	1	2	0	2	2	2	2	2	2	2	3	1	2
1	1	1	3	2	1	2	0	1	2	2	2	2	2	2	1	2	2
1	2	2	3	3	0	2	0	3	2	2	2	2	2	2	1	3	2
1	1	1	3	2	0	4	0	6	3	2	2	2	2	2	1	2	2
1	1	1	2	2	1	2	0	1, 6, 2	2	2	2	2	1	2	3	2	1
1	2	1	3	1	1	2	0	1 , 2 , 4	2	2	2	2	2	2	3	4	2
1	2	1	3	2	1	2	1	1, 6, 2	1	2	2	2	2	2	1	2	2
1	1	1	2	2	1	2	0	3	2	1	2	2	2	2	3	3	1
1	3	2	3	3	1	2	0	3, 1 , 2	2	2	2	2	2	2	2	2	1
1	2	1	3	3	1	2	0	3	2	1	1	2	2	2	1	4	2
1	3	2	3	3	1	2	0	2	2	2	1	2	1	2	1	3	1
2	1	1	3	2	1	2	1	3, 1, 6	2	2	2	2	2	2	3	2	1
2	1	1	3	2	1	2	0	3	2	2	2	2	2	2	1	4	1
2	1	1	3	2	1	2	0	3	2	2	2	2	2	2	1	4	1
1	2	1	3	1	1	2	0	1 , 2	2	2	2	2	2	2	3	4	2
2	1	1	3	2	1	2	1	1	3	2	2	2	2	2	1	1	2
2	1	1	2	2	1	3	0	2	1	2	2	2	2	2	3	2	1
2	2	2	2	5	1	1	0	1 , 2	2	2	2	2	2	2	3	1	1
1	4	2	3	5	1	2	0	1	2	2	2	2	2	2	3	3	2
2	3	2	3	5	1	6	0	1	2	2	2	2	2	2	4	1	1
2	1	1	2	2	1	2	1	3, 4,5	2	2	2	2	2	2	1	2	1
2	2	1	3	5	1	2	0	2	2	2	1	2	2	2	1	4	2
1	1	1	2	2	1	7	1	1 , 2	2	2	2	2	2	2	1	2	2
2	2	1	3	5	1	2	0	2	2	2	2	2	2	2	4	3	2
2	1	1	3	2	1	1	0		2	2	2	2	2	2	1	3	2
1	3	2	2	1	1	2	0	1	2	2	2	2	2	2	4	4	2
2	1	1	2	2	1	2	0	1 , 2	2	2	2	2	2	2	2	2	1
1	2	2	3	3	1	2	0	2	2	2	2	2	2	2	3	4	2
1	2	1	3	2	1	2	0	1 , 2	2	2	2	2	2	2	1	1	1
1	2	1	2	3	1	2	1	3	3	2	2	2	2	2	1	2	2
2	2	2	3	5	1	2	0	1	2	2	2	2	2	2	3	4	2
1	2	2	3	3	0	2	1	3, 6	1	2	2	2	2	2	1	4	1
2	2	2	3	3	1	2	0	3, 1, 6, 2	2	2	2	2	2	2	4	3	2
1	2	2	3	3	1	2	0	2	2	2	2	2	2	2	2	3	1
1	3	2	3	3	1	2	0	1	2	2	2	2	2	2	2	2	1
1	2	1	3	2	0	2	0	3, 1	2	2	2	2	2	2	1	4	1
1	2	1	3	2	0	6	0	1	3	2	2	2	2	2	3	3	2
1	2	1	3	3	0	2	0	6	3	1	1	2	2	2	3	1	2
1	1	1	3	2	1	2	1	1 , 2	2	2	1	2	2	2	3	2	1
1	1	1	3	1	1	2	0	1 , 2 , 4	2	2	2	2	2	2	1	1	2
2	1	1	2	2	1	2	0	6	2	2	2	2	2	2	1	3	1
1	3	2	2	3	1	2	0	3, 1, 6, 2, 4	2	2	2	2	2	2	1	3	2
2	2	2	3	2	1	2	0	1, 6, 2	2	2	2	2	2	2	3	2	1
1	2	2	3	3	1	2	0	3	2	2	2	2	2	2	3	2	2
1	2	1	3	3	1	2	1	1	2	2	2	2	2	2	1	1	2
1	2	2	3	3	1	2	0	2	2	2	2	2	2	2	1	3	1
2	2	2	3	1	1	2	1	2	2	2	2	2	2	2	1	2	1
1	1	1	3	2	1	2	0	1 , 2	2	2	2	2	2	2	3	2	1
1	2	2	2	3	1	2	0	1	2	2	2	2	2	2	1	4	1
1	2	2	3	3	1	5	0	2	3	2	2	2	2	2	4	1	1
1	2	1	3	1	1	2	0	1	2	2	2	2	2	2	3	4	2
1	1	1	3	2	0	7	0	2	2	2	2	2	2	2	1	4	2
2	2	2	3	5	0	6	0	1	2	2	2	2	2	2	3	3	1
2	3	2	3	5	1	2	0	1, 4	2	2	2	2	2	2	3	3	1
1	2	2	3	3	1	6	0	1 , 2	2	2	2	2	2	2	2	4	1
1	1	1	3	2	1	2	0	1	2	2	2	2	2	2	3	2	2
1	1	1	3	1	1	2	0	1 , 2	2	2	2	2	2	2	1	2	2
2	1	1	2	2	1	2	0	6	2	2	2	2	2	2	1	3	1
2	1	2	3	2	1	6	0	1, 6, 2	5	2	2	2	2	2	1	2	2
2	1	1	2	2	1	2	1	1	2	2	2	2	2	2	3	4	2
1	1	1	3	2	1	2	0	1	2	2	2	2	2	2	3	4	2
1	1	1	3	2	1	2	1	3,5	2	1	2	2	2	2	3	3	2
1	1	1	3	2	1	2	0	3, 1, 6, 2	2	2	2	2	2	2	1	2	2
1	1	1	3	2	1	2	0	6	2	2	2	2	2	2	3	4	2
1	3	2	3	5	1	2	0	1	2	2	2	2	2	2	1	2	1
1	2	2	3	3	1	2	1	1 , 2	2	2	2	2	2	2	1	2	2
1	1	1	3	2	1	2	0	6	2	2	2	2	2	2	3	4	1
1	2	1	2	3	0	2	0	6	2	1	2	2	2	2	4	3	1
2	3	2	3	3	0	7	0	3	2	2	2	2	2	2	1	2	2
2	1	1	3	2	0	2	0	2, 4	3	2	2	1	1	2	4	2	2
2	1	2	3	2	1	2	0	1	2	2	2	2	2	2	1	4	2
1	1	1	2	2	1	2	0	1 , 2	2	2	1	2	2	2	3	2	2
2	1	1	3	2	1	2	0	2	2	2	2	2	2	2	1	2	1
1	3	2	3	3	0	7	0	1	2	2	2	2	2	2	3	4	2
1	3	2	3	3	1	3	0		2	2	2	2	2	2	4	2	1
1	3	2	3	3	1	2	0	2	2	2	2	2	2	2	1	1	2
2	1	1	3	2	0	2	1	4	2	2	2	2	2	2	3	3	1
1	1	1	3	2	1	2	0	1, 6, 2	2	2	2	2	2	1	4	3	1
1	2	1	3	3	1	2	0	2	2	2	2	2	2	2	3	4	2
1	3	2	3	3	1	2	1	3, 1	2	2	2	2	2	2	1	4	2
2	3	1	2	5	1	2	0	1	2	2	2	2	2	2	3	3	1
1	3	2	2	3	0	2	1	3	3	2	2	1	2	1	1	2	1
1	2	1	3	1	1	2	0	3	2	2	2	2	2	2	3	2	2
1	2	1	3	3	1	1	0	3, 1, 6, 2, 4	2	2	1	2	2	2	3	4	1
1	3	2	3	3	1	2	0	6	2	2	2	2	2	2	1	2	2
2	2	2	3	2	1	6	0	1	2	2	2	2	2	2	1	1	1
1	3	2	2	3	1	5	0	2	2	2	2	1	2	2	3	2	2
2	1	1	2	2	1	2	0	2	2	2	2	2	2	2	2	2	2
1	1	1	3	2	1	2	0	2	2	2	2	2	2	2	3	2	1
2	1	1	3	2	1	2	0	6	2	2	2	2	2	2	1	2	2
1	3	2	3	5	1	3	0		1	2	2	2	2	2	1	1	1
2	2	2	3	5	0	7	0	2	2	2	2	2	2	2	3	2	1
1	1	1	3	2	1	2	0	1 , 2	2	1	2	2	2	2	1	2	1
1	2	2	3	2	1	1	1	4,5	3	2	2	2	2	2	3	4	2
2	2	1	3	1	1	2	0	1	2	2	2	2	2	2	2	4	2
1	2	1	3	2	1	2	0	2	2	1	2	2	2	2	3	2	1
2	1	1	3	2	1	2	0	1	2	1	2	2	2	2	3	4	2
1	2	1	3	2	1	2	0		2	2	2	2	2	2	1	4	1
2	2	1	3	3	1	2	0	1	2	2	2	2	2	2	3	4	2
2	1	1	3	2	1	2	0	2	2	2	2	2	2	2	1	2	1
1	1	1	3	5	1	2	0	3, 6	2	2	1	2	2	2	3	4	2
2	2	1	3	1	1	2	0	3	2	2	2	2	2	2	2	4	2
1	1	1	3	2	1	2	0	1	2	2	2	2	2	1	3	2	1
2	1	1	3	2	1	2	0	2	2	2	2	2	2	2	3	2	2
1	1	1	3	2	1	2	0	2	2	2	2	2	2	2	3	1	2
2	2	1	3	5	0	2	1	1	2	2	2	2	2	2	3	2	2
2	2	1	3	2	1	5	0	3	2	1	2	2	2	2	3	2	1
2	2	1	3	2	1	2	0	3, 1, 6	2	2	1	2	2	2	1	2	2
2	1	1	2	4	0	2	1	1	3	2	2	2	2	2	3	3	1
2	2	1	3	2	1	5	0	3	2	1	2	2	2	2	3	2	1
1	2	2	3	3	1	2	1	1	2	2	2	2	2	2	3	4	2
2	3	2	2	5	0	7	1	1	2	2	2	2	2	2	3	4	1
2	1	2	2	5	1	2	1	1	2	2	2	2	2	1	3	2	1
1	2	1	3	2	1	2	1	6	2	2	2	2	2	2	1	4	2
1	3	2	3	1	1	2	0	1	2	2	2	2	2	2	2	2	1
1	1	1	3	2	1	2	0	1 , 2	2	2	2	2	2	2	3	1	1
1	1	1	2	2	1	6	0	6	2	2	2	2	2	2	2	2	2
1	1	1	3	2	1	2	0	1 , 2	2	1	2	2	2	2	1	2	1
1	2	1	3	1	1	2	1	1 , 2	2	2	2	2	2	2	3	2	1
1	1	1	2	2	1	2	0	1	2	2	2	2	2	2	1	3	2
2	1	1	3	2	1	2	1	3	2	2	2	2	2	2	1	2	2
2	2	1	3	2	1	6	1	6	2	2	2	2	2	2	4	2	2
2	2	1	3	4	1	6	0	1 , 2	2	2	2	2	2	2	1	3	2
2	2	1	3	4	1	6	0	1 , 2	2	2	2	2	2	2	4	4	2
1	3	2	3	3	1	2	0	2	2	2	2	2	2	2	4	4	2
1	3	2	2	3	0	2	1	6	1	2	2	2	2	2	3	2	1
1	1	1	3	2	0	6	1	1	2	2	2	2	2	2	3	4	1
1	2	1	3	1	1	2	0	1 , 2	2	2	2	2	2	2	1	1	2
2	1	1	2	1	0	2	0	3	2	2	2	2	2	2	1	2	2
1	3	2	3	3	1	2	0	1 , 2	2	2	2	2	2	2	3	2	1
2	2	2	2	5	1	2	0	1 , 2	2	1	1	2	2	2	3	3	2
2	2	1	3	2	1	4	0	1	2	2	2	2	2	2	3	3	1
2	2	2	3	4	1	6	0	1	2	2	2	2	2	2	2	3	1
2	2	1	3	4	1	2	0	3	2	2	1	2	2	2	3	3	1
2	2	2	3	1	1	2	1	3, 1, 6	2	2	2	2	2	2	1	1	2
2	2	1	3	1	1	2	0	1, 6, 2	2	2	2	2	2	2	3	2	1
1	1	1	3	2	1	6	1	2	2	2	2	2	2	2	3	3	1
1	2	1	3	2	1	2	0	2	2	2	2	2	2	2	4	3	1
1	1	1	3	2	1	7	0	6, 2	2	2	2	2	2	1	2	3	1
2	1	1	3	2	1	5	0		2	2	2	2	2	1	1	2	2
1	3	2	3	3	1	6	0	2	2	2	2	2	2	2	3	4	2
2	1	1	2	2	1	2	0	1 , 2	2	1	2	2	2	1	1	1	1
2	2	2	3	1	1	7	0	6	2	2	2	2	2	2	3	3	1
1	2	2	3	2	1	7	1	3, 6, 2	2	2	2	2	2	2	4	3	1
1	1	1	3	5	0	3	1	3, 1	3	2	2	2	2	2	3	2	2
2	3	1	3	3	1	2	0	1	2	2	2	2	2	2	3	2	1
2	2	2	3	4	1	3	0	1, 6, 2	2	2	2	2	2	2	1	4	1
2	3	2	3	3	1	3	0	3	2	2	2	2	2	2	3	1	2
1	1	1	2	2	1	2	1	3	2	2	2	2	2	2	3	3	2
1	2	1	2	3	0	3	1	1	2	2	2	2	2	2	3	2	1
1	4	2	2	5	1	3	1	2	1	2	2	2	2	2	1	2	2
1	2	1	3	2	1	5	0	6, 2, 4	4	2	2	2	2	2	1	2	1
2	2	2	3	5	0	2	1	3, 1	2	2	2	2	2	2	3	2	1
1	2	1	3	2	1	3	1	3	1	2	2	2	2	2	3	3	1
1	3	2	2	5	1	5	0	1	2	2	2	2	2	2	4	1	1
2	2	2	3	3	1	2	0	1	2	2	2	2	2	2	3	4	1
2	2	2	3	5	1	3	0	3, 6	2	2	1	2	2	2	1	2	1
1	2	1	2	3	1	2	0	1	2	2	1	2	2	2	3	2	1
2	1	1	3	2	1	2	0	3	2	1	2	2	2	2	1	3	2
1	2	2	3	2	1	2	1	3, 1, 6, 2	2	2	2	2	2	2	3	3	1
2	2	2	3	1	1	2	0	3, 1, 6, 2	2	1	1	2	1	1	3	3	2
1	2	2	3	3	1	6	0	1, 6, 2	2	2	2	2	2	2	1	3	2
2	2	1	3	3	1	6	0	3	1	2	2	2	2	2	1	4	2
2	3	2	1	5	1	6	0	2	2	2	2	2	2	2	3	3	1
2	1	1	2	2	1	2	0	2	2	2	2	2	2	2	1	4	2
1	3	2	3	3	1	6	0	1 , 2,5, 6	4	1	1	2	2	2	5	3	2
2	2	2	3	1	1	2	0	1 , 2	2	2	1	2	2	1	2	2	1
1	2	2	3	3	1	2	0	3, 1	2	2	2	2	2	2	2	1	2
2	2	2	3	1	1	2	0	1	2	2	2	2	2	2	1	3	1
2	1	1	2	2	1	2	0	3,5	2	2	2	2	2	2	3	4	2
2	1	1	2	2	1	2	1	1, 6, 2	2	2	2	2	2	2	3	2	1
2	3	2	3	3	0	2	1	1	2	2	2	2	2	2	3	2	1
2	1	1	2	2	1	2	0	3	2	2	2	2	2	2	3	2	1
1	2	1	2	3	1	6	0	6, 2	2	2	2	2	2	2	3	2	3
2	3	2	3	3	1	5	0	1	2	2	2	2	2	2	1	4	1
2	1	1	2	2	1	2	1	1	2	2	2	2	2	2	3	3	2
2	1	1	2	2	1	2	1	1 , 2	2	2	2	2	2	2	4	4	2
2	2	2	2	4	1	2	1	3, 1	2	2	2	2	2	2	1	3	1
1	2	1	2	2	1	2	1	2	1	2	2	2	2	2	3	4	1
2	1	2	3	2	1	2	0	1, 6, 2	2	2	2	2	2	2	1	4	2
1	3	2	3	3	1	1	0	4	2	2	1	2	2	2	3	1	1
2	2	2	3	2	1	3	1	2	2	2	2	2	2	2	3	2	2
1	1	1	2	1	1	2	0	6	2	1	1	2	2	2	3	2	1
1	1	1	3	1	0	6	0	1, 6, 2	2	2	2	2	2	1	3	2	1
2	2	2	3	2	0	2	1	1, 6	2	2	2	2	2	2	1	3	2
2	1	1	2	2	0	6	1	1 , 2	2	1	1	2	2	2	1	2	1
1	1	1	3	2	1	2	0	2	2	2	2	2	2	2	3	3	2
1	1	1	2	2	1	5	0	2	2	2	2	2	2	2	2	2	1
1	3	2	3	3	1	2	0	3, 1, 6, 2	2	2	2	2	2	2	1	4	1
1	1	1	3	2	1	2	0	3, 1 , 2	2	2	2	2	2	2	3	4	2
2	1	1	3	2	1	2	1	3, 1,5	2	2	2	2	2	2	1	3	1
2	2	1	3	1	1	2	1	3	2	2	2	2	2	2	1	2	1
1	1	1	3	2	1	3	0	3, 1 , 2	2	2	2	2	2	2	5	1	2
1	2	1	3	3	1	2	0	1	2	2	2	2	2	2	3	1	1
1	1	1	3	2	1	2	0	3, 1	3	2	2	2	2	2	1	2	2
1	1	1	3	2	1	6	0	3	2	2	2	2	2	2	3	3	2
1	2	1	3	1	1	2	0	1 , 2	2	2	1	2	2	2	1	1	2
1	1	1	3	2	1	1	0	3, 1 , 2	2	2	2	2	2	1	3	4	1
1	1	1	3	2	1	1	0	3, 1 , 2	2	2	2	2	2	1	3	4	1
1	1	1	2	2	1	2	0	2	2	2	2	2	2	2	3	2	1
2	2	1	3	5	0	2	1	1	2	2	2	2	2	2	3	2	2
1	1	1	2	2	1	2	0	3, 1, 6, 2, 4,5	2	2	2	2	2	2	1	2	1
1	2	2	3	3	1	2	0	2	2	2	2	2	2	2	3	3	2
2	1	1	2	2	1	2	1	2	1	2	2	2	2	2	3	2	1
1	1	1	3	1	1	2	0	3, 1 , 2	2	2	2	2	2	2	3	3	1
1	1	1	3	2	0	2	0	3	2	2	2	2	2	2	1	2	1
1	2	1	3	2	1	2	1	1, 6, 2	1	2	2	2	2	2	1	2	2
1	3	2	2	3	0	7	1	1	3	2	2	2	2	2	1	3	1
1	3	2	3	3	1	2	1	1 , 2	2	2	2	2	2	2	4	2	1
2	1	1	3	2	1	2	0		2	2	2	2	2	1	1	2	1
1	2	2	2	5	1	1	0	2	2	2	1	2	2	2	2	3	2
1	2	1	3	1	1	2	0	1	2	1	1	2	1	1	3	2	1
1	1	1	3	2	1	2	1	2	2	2	2	2	2	2	1	2	1
1	1	1	3	2	1	1	0	1 , 2	2	2	2	2	2	2	1	4	2
1	3	2	3	5	1	2	0	1, 6, 2	2	2	2	2	2	2	1	3	1
1	1	1	3	5	0	2	1	1 , 2	2	2	2	2	2	2	1	4	2
1	1	1	2	2	1	2	0	6	2	2	1	2	2	1	1	3	2
1	1	1	3	2	1	2	1	1	2	2	2	2	2	2	1	3	1
2	1	1	3	2	1	2	0	3	2	2	1	2	2	2	1	2	1
1	1	1	3	2	1	6	0		2	2	2	2	2	2	1	4	2
1	1	1	2	2	1	2	0	1, 6, 2, 4	2	2	2	2	2	2	3	3	1
2	2	2	3	5	0	2	0	1, 6, 2	2	1	2	2	2	2	3	2	1
2	3	1	3	3	1	2	0	1 , 2	2	2	2	2	2	2	1	4	1
1	1	1	2	2	1	2	0	1 , 2	2	2	2	2	2	2	1	3	1
2	2	1	3	5	1	5	0	1	2	2	2	2	2	1	2	4	1
1	3	2	2	1	1	2	0	1	2	2	2	2	2	2	1	2	2
2	1	1	3	5	1	6	0	3, 6, 2	2	2	2	2	2	2	3	3	2
1	2	2	3	5	1	2	0	2	2	2	2	2	2	2	1	4	2
1	3	2	3	3	1	6	0	2	2	2	2	2	2	2	1	2	1
1	3	2	2	3	0	2	1	1 , 2	1	2	2	2	2	2	1	1	2
1	3	2	3	5	1	2	0	1	2	2	2	2	2	2	1	3	3
1	1	1	3	1	1	2	0	3, 1 , 2	2	2	2	2	2	2	3	3	1
1	1	1	3	2	1	3	0	2	2	2	2	2	2	2	2	1	3
1	1	1	3	2	1	2	0	1	2	2	2	2	2	2	1	2	1
2	1	1	3	2	1	5	0	2	2	2	2	2	2	2	3	4	2
1	1	1	3	2	1	2	0	3, 4	3	2	2	2	2	2	1	1	2
2	2	2	2	4	1	2	0	3, 2	2	2	2	2	2	2	1	4	2
1	1	1	3	2	1	6	0		2	2	2	2	2	2	1	4	2
1	1	1	3	2	1	6	0		2	1	1	1	1	1	2	3	2
1	1	1	3	2	1	2	0	2	2	2	2	2	2	2	3	4	1
1	2	2	3	3	1	2	0	3	2	2	2	2	2	2	1	4	2
1	1	1	3	2	1	2	0	3, 1, 6, 2, 4,5	2	1	2	2	2	2	1	2	2
2	1	1	3	5	1	6	0	3, 1	2	1	1	2	2	2	2	4	2
1	1	1	2	2	1	2	0	6	2	2	2	2	2	2	1	3	1
1	3	2	2	3	1	2	1	2	1	2	2	2	2	2	3	2	2
1	1	1	3	2	1	2	0	2	2	2	2	2	2	2	3	4	2
1	1	1	2	2	1	3	0	6, 2, 4,5	2	2	2	2	2	2	4	1	2
1	2	2	3	3	0	2	0	3	2	2	2	2	2	2	2	2	1
1	1	1	2	2	1	3	0	6, 2, 4,5	2	2	2	2	2	2	4	1	2
1	2	2	3	3	1	1	0	1, 6, 2	2	2	2	2	2	2	3	4	2
1	2	1	3	3	1	2	0	3	3	2	2	2	2	2	1	2	2
1	1	1	3	2	1	2	0	6, 2	2	1	2	1	2	2	1	2	1
1	3	2	3	3	1	2	0	3, 1 , 2	2	2	2	2	2	2	2	4	2
2	1	1	3	2	1	3	0	1, 6, 4,5	2	2	2	2	2	2	1	3	2
1	3	2	3	3	1	2	0	1 , 2	2	2	2	2	2	2	1	1	2
1	2	2	3	3	1	2	0	1 , 2	2	2	2	2	2	2	1	1	1
1	1	1	3	2	1	2	0	6	2	2	2	2	2	2	1	4	1
2	1	1	3	2	1	6	0	6	1	2	2	2	2	2	3	2	2
1	2	2	3	3	1	1	0	1, 6, 2	2	2	2	2	2	2	3	4	2
2	1	1	3	2	0	2	0	2, 4	3	2	2	1	1	2	4	2	2
1	2	2	3	3	1	1	0	1,5	2	2	2	2	2	2	1	2	1
1	2	2	3	3	1	2	0	2	2	2	1	2	2	2	3	4	2
1	3	2	3	1	1	2	0	1	2	2	2	2	2	2	2	2	1
1	1	1	3	2	1	2	1	3, 1, 6, 2	2	2	2	2	2	2	1	2	1
1	2	2	3	3	1	2	0	1 , 2	2	2	2	2	2	2	1	1	1
1	2	2	3	2	1	1	1	4,5	3	2	2	2	2	2	3	4	2
2	1	1	2	2	1	2	0	1, 6, 2	2	2	2	2	2	2	3	4	2
1	3	2	3	3	1	2	0	2	2	2	2	2	2	2	1	1	2
2	1	1	2	2	0	6	1	1 , 2	2	1	1	2	2	2	1	2	1
2	1	1	2	2	1	2	1	1 , 2	2	2	2	2	2	2	4	4	2
2	1	1	3	2	1	6	0	3	2	2	2	2	2	2	2	2	1
2	3	2	3	3	1	2	0	3, 1, 6	2	2	2	2	2	2	3	1	1
1	1	1	3	2	1	2	0	6	2	2	2	2	2	2	3	2	1
1	2	1	3	1	1	2	0	1	2	2	2	2	2	2	1	2	1
1	1	1	3	1	1	3	1	6	1	2	2	2	2	2	4	4	2
1	2	1	3	1	1	2	0	1	2	2	2	2	2	2	1	2	1
1	1	1	3	2	1	2	0	3, 1	2	2	2	2	1	2	1	4	2
2	1	1	2	2	1	2	0	4,5	4	2	2	2	2	2	4	2	2
1	1	1	2	2	1	2	0	1 , 2	2	2	2	2	2	2	3	2	1
1	2	1	2	3	1	6	0	2	2	2	2	2	2	2	3	4	2
2	3	2	3	3	1	2	0	1 , 2	2	2	2	2	2	2	1	3	1
2	3	2	3	5	1	1	1	1	2	2	2	2	2	2	3	2	1
1	3	2	3	3	1	2	0	1 , 2	2	2	2	2	2	2	1	4	2
2	3	2	3	3	1	2	0	1, 6,5	2	2	2	2	2	2	3	2	2
2	3	2	3	3	1	2	0	3, 1 , 2,5	2	2	2	2	2	2	3	2	2
1	1	1	3	2	1	2	0	3, 1 , 2	2	2	2	2	2	2	1	2	2
1	1	1	2	2	1	6	0	2	5	2	2	2	2	2	1	3	2
1	1	1	2	2	1	2	0	6	2	2	2	2	2	2	1	3	1
2	3	2	2	3	1	2	1	1 , 2	2	2	2	2	2	2	3	4	1
2	3	2	3	3	1	2	0	1 , 2	2	2	2	2	2	2	3	4	1
1	1	1	3	2	1	2	0	6, 2	2	1	2	1	2	2	1	2	1
1	1	1	3	2	1	2	0	2	2	2	2	2	2	2	3	2	1
1	2	1	2	3	1	6	0	6, 2	2	2	2	2	2	2	3	2	3
1	2	1	3	2	1	2	0		2	2	2	2	2	2	1	4	1
1	1	1	2	2	1	2	0	1 , 2	2	2	2	2	2	2	3	2	1
1	3	2	3	1	0	2	0	1 , 2	2	2	2	2	2	2	3	1	3
1	1	1	2	2	1	6	0	6	2	2	2	2	2	2	2	2	2
2	2	1	3	3	1	2	0	1	2	2	2	2	2	2	3	4	2
2	3	2	3	3	1	2	0	3, 1	2	2	2	2	2	2	1	4	1
1	2	2	3	3	1	2	1	1 , 2	2	2	2	2	2	2	1	2	2
1	2	2	2	3	1	2	0	1	2	2	2	2	2	2	1	4	1
1	1	1	3	2	0	2	0	1	2	2	2	2	2	2	1	4	2
1	1	1	3	2	1	2	0	1	2	2	2	2	2	1	4	4	2
2	1	1	2	2	1	6	1	2	2	2	2	1	2	2	1	3	1
1	1	1	3	2	1	2	0	6, 2	2	2	2	2	2	2	3	2	1
1	1	1	3	2	1	2	0	3, 1, 6, 2	2	1	2	2	2	2	1	4	1
1	1	1	3	2	1	2	1	3	3	2	2	2	2	2	1	2	2
1	1	1	2	2	1	2	0	3, 1	2	2	2	2	2	2	1	4	2
1	1	1	2	2	1	2	0	1	2	2	2	2	2	2	1	2	1
1	1	1	3	2	1	2	0		2	2	2	2	2	2	3	4	2
1	1	1	3	2	1	2	0	3, 1	2	2	2	2	2	2	1	4	2
1	1	1	3	2	1	2	0	1	2	2	2	2	2	2	4	2	1
1	1	1	3	1	1	2	0	6, 2	2	2	2	2	2	2	1	2	1
1	1	1	3	2	1	2	0		2	2	1	2	2	2	1	4	2
1	1	1	2	2	1	2	0	3	2	2	2	2	2	2	3	4	1
1	2	1	3	5	1	2	0	1	1	2	2	2	2	2	4	3	1
1	1	1	3	2	1	2	0	1, 6, 2	2	2	2	2	2	2	3	3	1
1	1	1	3	2	1	6	0		2	2	2	2	2	2	1	2	2
1	2	1	2	2	1	1	0	2	2	2	2	2	2	2	3	2	2
1	1	1	3	2	1	2	0	3, 1 , 2 , 4	2	2	2	2	2	2	3	4	2
1	1	1	3	2	1	6	1	1	2	2	2	2	2	2	1	3	2
1	1	1	2	2	1	5	0	3	2	2	2	2	2	2	3	4	2
1	1	1	2	1	0	2	0	1 , 2	2	2	2	2	2	2	1	2	1
1	1	1	3	2	1	2	1	3	2	2	2	2	2	2	1	4	2
1	1	1	2	1	0	2	0	1 , 2	2	2	2	2	2	2	1	2	1
1	1	1	3	2	1	6	0	2, 4,5	3	2	2	2	2	2	3	1	1
1	1	1	3	2	0	2	1	3, 6, 2	2	2	2	2	2	2	3	4	2
2	1	1	3	2	1	1	1	1	2	2	2	2	2	2	1	1	1
1	1	1	3	2	1	6	1	1	3	2	2	2	2	2	3	2	2
2	1	1	3	2	1	2	1	5	2	2	2	2	2	2	1	2	2
2	1	1	3	2	1	2	0	1, 6, 4	2	2	2	2	2	2	3	2	1
1	1	1	3	2	1	2	0	1	2	2	2	2	2	1	1	3	1
2	1	1	3	2	1	1	1	1	2	2	2	2	2	2	1	1	1
2	1	1	3	2	1	2	0	3, 1 , 2	2	2	2	2	2	2	1	4	2
2	1	1	3	2	1	2	0	1, 6, 4	2	2	2	2	2	2	3	2	1
1	1	1	3	2	1	2	1	3, 1 , 2	2	2	2	1	2	2	1	2	1
2	1	1	2	2	1	2	0	1,2	2	2	2	2	2	2	1	2	1
2	1	1	3	2	1	3	0	3, 1, 6, 2	2	2	2	2	2	2	3	2	1
1	1	1	3	2	1	2	0	1	2	2	2	2	2	2	1	2	1
1	1	1	3	2	1	2	1	3, 1 , 2	2	2	2	1	2	2	1	2	1
2	2	1	3	2	1	3	1	1	2	2	2	2	2	2	3	4	2
1	2	1	3	2	1	2	0	1	2	2	2	2	2	2	3	2	2
1	1	1	3	2	0	2	0	1	2	2	2	2	2	2	1	2	2
1	1	1	3	2	0	2	0	3, 1	2	2	2	2	2	2	3	4	1
1	3	2	3	3	0	2	0	1	2	2	2	2	2	2	3	4	2
1	1	1	2	2	1	2	0	3, 1	2	2	2	2	2	2	1	4	2
1	1	1	3	2	1	6	1	1	3	2	2	2	2	2	3	2	2
2	1	1	3	2	1	3	0	3, 1, 6, 2	2	2	2	2	2	2	3	2	1
1	1	1	3	2	0	2	0	1	2	2	2	2	2	2	1	4	2
1	2	2	3	3	1	2	0	6, 2	2	2	2	2	2	2	1	2	1
1	3	2	3	1	1	6	1	6	2	2	2	2	2	2	1	1	1
1	2	2	3	3	1	2	1	1 , 2	2	2	2	2	2	2	1	3	2
1	2	2	3	3	1	2	0	3	2	2	2	2	2	2	3	2	2
2	1	1	3	2	1	3	0	3, 1, 6, 2	2	2	2	2	2	2	3	2	1
1	3	2	3	3	1	3	1	2	1	2	2	2	2	2	3	1	2
1	2	1	3	3	1	2	0	6	2	2	2	2	2	2	3	2	1
2	2	1	3	3	1	2	0	3, 1, 6	2	1	2	2	2	2	1	4	2
1	2	1	3	3	1	2	0	1	2	2	2	2	2	2	1	2	2
1	2	2	3	3	1	2	1	1	1	2	2	2	2	2	3	2	2
1	2	2	3	3	1	2	1	3, 4	2	2	2	2	2	2	2	1	1
1	2	2	2	3	1	2	1		2	1	1	1	1	1	3	3	2
1	2	2	3	3	1	2	0	3, 6, 2	3	2	2	2	2	2	3	3	2
1	2	2	3	3	1	2	1	2	2	2	2	2	2	2	4	3	2
2	2	1	3	3	0	2	1	3, 1, 6, 2	1	2	2	2	2	2	1	4	1
1	2	2	3	3	1	6	0	6, 2	2	2	2	2	2	2	3	4	2
1	2	2	3	3	1	2	1	1 , 2	2	2	2	2	2	2	3	3	2
1	3	2	3	3	1	2	1	4,5	1	2	2	2	2	2	1	2	1
1	3	2	3	3	1	2	1	4,5	1	2	2	2	2	2	1	2	1
1	2	2	3	3	1	2	1	3	2	2	2	2	2	2	3	4	2
1	2	2	3	1	1	3	1	3, 1, 6, 2	1	2	2	2	2	2	1	2	1
2	1	1	3	2	1	3	0	3, 1, 6, 2	2	2	2	2	2	2	3	2	1
1	2	2	3	3	1	2	1	2	1	2	2	2	2	2	3	2	1
1	2	2	3	3	0	3	1	1	1	2	2	2	2	2	3	2	2
1	3	2	2	3	1	2	1	1	2	2	2	2	2	2	1	2	1
1	2	2	3	3	1	3	1	6	2	2	2	1	2	2	3	2	2
1	2	2	2	3	1	2	0	3, 1	2	2	2	2	2	2	1	2	1
2	1	1	2	2	1	2	0	1,6	2	2	2	2	2	2	1	2	1
1	2	2	3	3	0	2	0	3	2	2	2	2	2	2	1	4	1
1	3	2	3	3	0	3	0	1 , 2	3	2	2	2	2	2	1	2	2
1	3	2	3	3	1	6	1	1	2	2	2	2	2	2	3	4	2
1	3	2	2	3	0	6	0	1	1	2	2	2	2	2	4	4	2
1	3	2	2	3	0	2	1	2	2	2	2	2	2	2	1	3	2
2	3	2	2	3	1	2	0	6, 2	2	2	2	2	2	2	1	3	1
1	2	1	3	1	1	2	0	1 , 2	2	2	2	2	2	2	1	2	1
1	2	1	2	3	0	5	0	6	4	1	2	2	2	2	1	2	1
1	2	2	3	3	0	2	0	1 , 2	2	2	2	2	2	2	1	2	2
1	3	2	2	5	1	2	0	1	2	2	2	2	2	2	1	3	2
1	2	1	2	3	0	2	0	2	2	2	2	2	2	2	1	2	1
1	1	1	3	2	1	2	0	1 , 2	2	2	2	2	2	2	1	2	2
1	2	1	3	3	1	2	1	2	2	2	2	2	2	2	1	2	1
1	3	2	3	3	1	6	0	3	2	2	2	2	2	2	1	4	2
1	2	2	2	3	0	1	1	2	1	2	2	2	2	2	3	2	1
1	3	2	3	3	0	1	0	1, 4,5	2	2	2	2	2	2	1	2	2
1	2	2	3	3	1	2	1	2	1	2	2	2	2	2	1	1	2
1	3	2	3	1	0	2	1	3	2	2	2	2	2	2	1	2	2
2	3	2	3	3	1	2	1	3	1	2	2	2	2	2	3	2	1
1	3	2	3	3	1	1	1	1	2	2	2	2	2	2	2	2	1
1	2	2	3	3	1	2	1	1, 6, 2	2	2	2	2	2	2	1	4	2
1	3	2	3	3	1	2	1	3,5	2	2	2	2	2	2	1	4	1
1	3	2	3	3	1	2	0	3, 1 , 2	2	2	2	2	2	2	3	3	2
1	3	2	2	3	1	3	0	2,5	1	2	2	2	2	2	1	2	2
1	2	2	2	1	1	2	0		2	2	2	2	2	1	3	4	2
2	2	1	3	3	1	2	0	1	2	2	2	2	2	2	1	1	2
1	4	2	2	5	0	2	1	5	1	2	2	2	2	2	3	1	1
1	2	2	3	1	1	6	0	3	2	2	2	2	2	2	1	1	1
1	3	2	3	3	0	6	1	2	3	2	2	2	2	2	3	2	2
1	1	1	2	2	1	2	0	6	2	2	2	2	2	2	1	3	1
1	3	2	2	3	1	3	0	2, 4	1	2	2	2	2	2	1	4	2
1	2	2	2	3	0	6	0	1	2	2	2	2	2	2	3	3	1
1	2	1	3	1	1	2	0	1	2	2	2	2	2	2	3	4	2
1	2	2	2	1	0	1	1	2	2	2	2	2	2	2	1	4	2
1	3	2	3	1	1	2	0	1,5	2	2	2	2	2	2	3	2	1
1	2	1	3	3	1	2	0	3, 1 , 2 , 4,5	2	2	2	2	2	2	1	4	2
1	2	2	3	3	1	2	0	2	2	2	2	2	2	2	1	2	2
1	3	2	2	3	1	2	1	1	1	2	2	2	2	2	3	2	2
2	2	1	3	3	1	2	0	6	2	2	2	2	2	2	4	4	2
1	3	2	2	3	0	2	1	3	2	2	2	2	2	2	1	2	1
1	2	2	3	3	1	2	0	1	2	2	2	2	2	2	3	3	1
1	2	2	3	3	1	2	1	1	2	2	2	2	2	2	3	4	1
1	3	2	2	3	0	6	0	3	1	2	2	2	2	2	3	2	1
1	3	2	2	3	0	3	1	3	2	2	2	2	2	2	1	2	1
1	2	1	3	1	1	2	0	1	2	2	2	2	2	2	3	4	2
1	4	2	2	5	1	2	0	2	2	2	2	2	2	2	2	2	1
1	3	2	3	3	1	2	0	2	2	2	2	2	2	2	4	4	2
1	3	2	3	1	1	2	0	3	2	2	2	2	2	2	1	3	2
1	3	2	2	5	1	2	0	3, 1 , 2	2	2	2	2	2	2	1	1	1
1	1	1	3	1	1	2	0	6, 2	2	2	2	2	2	2	1	2	1
1	1	1	3	5	0	3	0	5	2	2	2	2	2	2	1	2	1
1	2	2	3	3	1	5	1	6, 2, 4,5	1	2	2	2	2	2	1	4	1
1	2	2	3	3	1	2	1	1 , 2	2	2	2	2	2	2	3	2	1
1	2	2	2	3	1	2	1	1 , 2	2	2	2	2	2	2	1	3	1
1	3	2	2	5	0	5	1	1	4	2	2	2	2	2	1	4	1
1	3	2	3	1	1	2	0	1	2	2	2	2	2	2	4	4	2
1	2	2	2	3	1	2	0	1, 6	2	2	2	2	2	2	3	3	1
1	3	2	3	3	1	5	1		2	2	2	2	2	2	1	4	2
1	2	2	3	3	0	5	1	2	2	2	2	2	2	2	1	1	1
1	2	2	3	3	1	2	0	1	2	2	2	2	2	2	1	3	1
1	3	2	2	3	1	2	0	1	2	2	1	2	2	1	5	4	2
1	2	2	3	3	1	2	1	3, 4	2	2	2	2	2	2	2	1	1
2	3	2	3	3	1	2	0	1, 6	2	2	2	2	2	2	1	3	2
1	2	2	3	1	1	2	0	2	2	2	2	2	2	2	1	4	1
1	2	2	3	1	1	2	0	2	2	2	2	2	2	2	1	4	1
1	2	2	3	3	1	3	1	4	2	2	2	2	2	2	1	3	2
1	1	1	3	2	1	2	0	3	2	2	2	2	2	2	4	3	2
1	2	2	3	1	0	3	1	3	1	2	2	2	2	2	1	2	1
2	2	1	3	2	1	2	1	1	2	2	2	2	2	2	3	4	2
1	3	2	3	3	1	2	0	3	2	2	2	2	2	2	1	4	2
1	3	2	2	3	0	2	1	3	1	2	2	2	2	2	3	2	1
1	2	2	2	3	0	2	1	2	2	2	2	2	2	2	1	4	2
1	2	2	3	3	1	2	0	1	2	2	2	2	2	2	3	4	2
1	3	2	3	3	0	6	0	1	1	2	2	2	2	2	4	2	1
1	3	2	2	5	1	1	0	3, 4,5	2	2	2	2	2	2	4	4	2
1	2	2	3	3	1	2	0	3, 1 , 2	2	2	2	2	2	2	3	4	2
1	3	2	3	3	1	2	0	6	2	2	2	2	2	2	3	4	2
1	2	2	3	3	0	3	1	2	2	2	2	2	2	2	3	4	1
2	2	1	3	1	1	1	1	6, 2	2	2	2	2	2	2	3	3	1
1	3	2	2	5	1	2	0	3, 1 , 2	2	2	2	2	2	2	1	1	1
1	2	2	2	3	1	2	0	3, 1	2	2	2	2	2	2	1	2	1
1	2	2	3	3	1	2	1	1 , 2	2	2	2	2	2	2	1	3	1
1	3	2	3	1	0	2	1	2	2	2	2	2	2	2	3	2	2
1	3	2	3	3	1	2	0	6	2	2	1	2	2	2	1	4	2
1	2	1	3	1	0	6	0	2	2	2	2	2	2	2	4	3	2
1	2	2	3	3	1	6	0	2	2	2	2	2	2	2	1	4	2
1	3	2	2	3	0	6	0	6	1	2	2	2	2	2	2	3	1
1	2	1	3	3	1	2	0	1 , 2	2	2	2	2	2	2	3	2	1
1	3	2	3	3	1	2	0	6	2	2	2	2	2	2	1	1	2
1	2	2	3	3	1	6	0	6, 2	2	2	2	2	2	2	3	4	2
2	2	1	3	1	1	1	1	2	2	2	2	2	2	2	1	2	1
1	2	2	3	3	1	2	0	3, 1	2	2	2	2	2	2	1	4	2
1	2	2	3	3	1	2	1	3	2	2	2	2	2	2	3	4	2
1	3	2	2	5	1	2	1	3, 1	3	2	2	2	2	2	3	2	1
1	2	1	3	3	1	2	0	1	2	2	2	2	2	2	3	4	2
1	3	2	3	3	1	5	1		2	2	2	2	2	2	1	4	2
1	1	1	3	2	0	2	0	1	2	2	2	2	2	2	1	2	2
1	3	2	2	3	1	1	0	1 , 2,5	2	2	2	2	2	2	3	4	2
1	3	2	3	3	1	2	0	6	2	2	2	2	2	2	2	1	2
1	2	2	3	3	1	2	1	2	1	2	2	2	2	2	1	1	2
1	2	1	3	3	1	2	0	6	4	2	2	2	2	2	1	3	2
1	3	2	2	5	1	1	0	3	2	2	2	2	2	2	3	1	1
1	2	2	3	3	1	2	0	3	2	2	2	2	2	2	4	3	2
1	2	1	3	5	1	2	0	2	2	2	2	2	2	2	1	3	1
2	3	2	3	3	1	6	0	1 , 2	2	2	2	2	2	2	3	2	1
2	3	2	2	3	1	2	0	6, 2	2	2	2	2	2	2	1	3	1
1	3	2	3	1	1	2	0	1	2	2	2	2	2	2	3	3	1
1	3	2	2	1	0	2	1	1	2	2	2	2	2	2	1	2	1
1	2	2	3	3	1	2	0	3, 1 , 2	2	2	2	2	2	2	1	2	1
1	3	2	3	3	1	2	0	1,5	2	2	2	2	2	2	1	2	2
1	3	2	3	3	1	2	0	1 , 2	2	2	2	2	2	2	4	3	2
1	2	1	3	1	1	2	0	1	2	2	2	2	2	2	3	4	2
1	2	1	3	3	1	2	0	6	4	2	2	2	2	2	1	3	2
1	2	2	3	3	0	5	1	2	2	2	2	2	2	2	1	1	1
1	2	2	3	1	1	2	0	1	2	2	2	2	2	2	1	4	2
2	4	2	1	1	0	4	1	5	4	1	1	1	1	1	4	4	1
1	2	2	3	3	1	2	0	1	2	2	1	2	2	2	3	4	2
1	2	2	3	3	0	1	0	3	2	2	2	2	2	2	4	1	1
1	2	2	3	3	1	2	1	3	2	2	2	2	2	2	3	4	1
1	3	2	3	5	1	2	0	1	2	2	2	2	2	2	1	3	2
1	3	2	2	3	1	5	1	3	4	2	2	2	2	2	1	3	2
1	2	2	3	3	1	2	1	3	2	2	2	2	2	2	3	4	1
1	2	2	3	3	1	5	0	1 , 2,5	2	2	2	2	2	2	1	1	2
1	2	2	3	3	1	2	0	1 , 2	2	2	2	2	2	2	1	4	1
1	2	2	2	3	1	6	0	3, 1 , 2	2	2	2	2	2	2	1	2	1
1	3	2	2	3	1	2	1	3, 1, 6	1	2	2	2	2	2	2	2	1
1	2	2	3	3	0	2	1	2	1	2	2	2	2	2	2	2	2
1	2	2	3	1	1	2	0	1	2	2	2	2	2	2	1	4	2
1	2	2	3	3	1	3	0	2	2	2	2	2	2	2	1	3	3
2	2	1	3	1	1	1	1	6, 2	2	2	2	2	2	2	3	3	1
1	3	2	3	3	1	2	1	2	2	2	2	2	2	2	1	1	2
1	2	1	3	3	1	2	0	1	2	2	2	2	2	2	3	4	2
1	2	2	3	3	1	2	1	1 , 2	2	2	2	2	2	2	1	3	1
1	3	2	3	3	1	2	0	1 , 2	2	2	2	2	2	2	2	2	2
1	2	2	3	3	1	5	1	6, 2, 4,5	1	2	2	2	2	2	1	4	1
1	2	2	3	3	1	2	0	3, 1 , 2	2	2	2	2	2	2	1	2	1
1	2	1	3	1	1	3	0	1,5	2	2	2	2	2	2	1	1	2
1	1	1	3	2	1	2	0	1 , 2	2	2	2	2	2	2	1	2	2
1	2	1	3	5	1	2	0	2	2	2	2	2	2	2	1	3	1
1	2	1	2	3	0	2	0	2	2	2	2	2	2	2	1	2	1
1	2	1	3	5	0	2	1	2	2	1	2	2	2	2	1	2	1
2	2	1	3	5	1	5	0	1	2	2	2	2	2	1	2	4	1
1	2	2	3	3	1	2	0	2	2	2	2	2	2	2	2	3	1
1	2	2	3	3	1	2	1	1	2	2	2	2	2	2	3	4	2
1	3	2	3	1	1	2	0	1	2	2	2	2	2	2	3	3	1
1	2	2	3	3	1	2	0	2	2	2	2	2	2	2	2	3	1
1	3	2	3	3	1	6	0	3	2	2	2	2	2	2	1	4	2
1	1	1	3	3	1	2	1	2	2	2	2	2	2	2	3	1	2
1	2	2	3	3	0	2	0	3	2	2	2	2	2	2	1	4	1
1	2	2	3	3	1	2	0	1	2	2	2	2	2	2	1	3	1
1	3	2	3	3	1	2	0	3, 1 , 2	2	2	2	2	2	2	3	3	2
1	2	1	3	1	1	6	0	6, 2,5	2	2	2	2	2	2	3	2	1
1	1	1	3	3	1	2	1	2	2	2	2	2	2	2	3	1	2
1	2	2	3	3	1	2	0	3, 6, 2	3	2	2	2	2	2	3	3	2
2	2	2	3	3	1	6	0	2	2	2	2	2	2	2	1	3	1
1	2	2	3	3	0	2	0	3	2	2	2	2	2	2	1	4	1
1	3	2	3	1	1	6	1	3, 1 , 2	3	2	2	2	2	2	3	2	1
2	2	1	3	5	1	2	0	6, 2	2	2	2	2	2	2	4	4	2
2	2	1	3	1	1	1	1	6, 2	2	2	2	2	2	2	3	3	1
1	3	2	2	3	1	3	0	6,5	2	1	1	2	2	1	3	3	1
2	2	2	3	5	1	2	0	6, 2	2	2	2	2	2	2	3	3	2
2	1	1	3	4	1	2	0	6	2	2	2	2	2	2	3	3	1
1	1	1	3	2	0	2	0	3, 1	2	2	2	2	2	2	3	4	1
2	1	1	2	2	1	2	0	3, 1	2	2	2	2	2	2	3	4	2
1	2	2	3	3	1	3	0	2	2	2	2	2	2	2	3	1	1
2	3	2	3	3	1	2	0	1 , 2	2	2	2	2	2	2	3	4	1
1	3	2	2	5	0	5	1	1	4	2	2	2	2	2	1	4	1
1	2	2	2	3	1	2	0	3, 1	2	2	2	2	2	2	1	2	1
1	4	2	3	3	1	2	0	1, 6, 2	2	2	2	2	2	2	5	2	2
2	2	1	3	5	1	5	0	1	2	2	2	2	2	1	2	4	1
1	2	2	3	3	1	1	0	1,5	2	2	2	2	2	2	1	2	1
2	3	2	3	5	0	3	0	1	2	2	2	2	2	2	3	3	1
2	1	1	3	2	1	1	1	1 , 2 , 4,5	1	2	2	2	2	2	1	2	2
1	3	2	2	3	0	6	0	3	1	2	2	2	2	2	3	2	1
1	1	1	3	2	1	2	0	1 , 2	3	2	2	2	2	2	3	4	1
1	3	2	3	5	1	2	0	1, 6, 2	2	2	2	2	2	2	1	3	1
2	2	2	3	3	1	2	0	6, 2	2	2	2	2	2	2	3	2	2
1	2	1	3	3	1	6	0	1 , 2	3	2	2	2	2	2	3	3	1
2	1	1	2	2	1	2	0	6	2	2	2	2	2	2	1	4	2
1	1	1	2	2	1	3	0	2	2	1	1	1	2	2	3	3	1
2	2	1	3	5	1	6	0	3, 1	2	2	2	2	2	2	1	2	1
2	1	1	3	2	1	6	0	4,5	2	2	2	2	2	2	4	2	2
1	1	1	3	2	1	5	0	1, 6, 2	2	2	2	2	2	2	1	2	2
1	2	2	3	2	1	2	0	1	2	2	2	2	2	2	3	2	1
1	2	2	3	3	1	2	0	2	2	2	1	2	2	2	1	4	2
1	1	1	2	2	1	2	0	6	2	2	2	2	2	2	1	3	1
1	1	1	2	2	1	2	0	6	2	2	2	2	2	2	1	3	1
1	1	1	2	2	1	2	0	6	2	2	2	2	2	2	1	3	1
2	1	1	2	2	1	2	0	2	2	2	2	2	2	2	2	2	2
1=Male	1=18-24	1=Single	1=illiterate	1=Self employed	1=yes	1=Medicine expired	1=yes	1=Oral antibiotics	1=Returning to pharmacist	2 = Positive	2 = Positive	2 = Positive	2 = Positive	2 = Positive	1=Providing proper guidance to the consumer	1=Awareness programs by the government	1 = HCP
2=Female	2=25-39	2=Married	2=Secondary	2=Student	2=no	2=Symptoms imporve and felt better	2=no	2=Pain relievers	2=Garbage	1 = Negative	1 = Negative	1 = Negative	1 = Negative	1 = Negative	2=Reducing the number of prescribed medications	2=Patient education by HCP	2 = Social media
	3=40-59		3=College	3=Govt employed		3=Doctor changed medication		3=Topical antibiotics	3=Sink						3=Prescribe in quantities and for duration that ensure patient compliance	3=Written instructions on medicines
	4=60 and above			4=Housewife		4=Changed to herbal medicines		4=Antihypertensives	4=Giving away to friends						4=Donating or sharing unused medication	4=Information via social media
				5=Others		5=Did nto feel helping condition		5= Anti diabetics	5=Others						5=Others
						6=Self discontiuation		6 = Others
						7=Experienced side effects

## Sheet: Questionnairre
I	Demographic characteristics
1	1 - Gender
2	2 - Age in years
3	3 - Marital status
4	4 - Education
5	5 - Occupation
II	Presence of unused/expired medications
6	6 - Are there any unused medicines at your home?
7	7 - What might be the possible reasons for the availability of unused medicines at home?
III	Disposal of unused/expired drugs
8	8 - Do you know about the proper method for medication disposal?
9	9 - Which type of medicine did you dispose of recently?
10	10 - How do you dispose your unused or expired medicines?
IV	Perception on safe disposal of unused/expired medicines
11	11 - Do you think unused/expired medicines at home are potentially risks for the community?
12	12 - Do you think unsafe drug disposal practices pose a threat to our environment?
13	13 - Do you think there is lack of adequate information on safe disposal of unused and expired household medicines?
14	14 - Do you think public must be sensitized about the impact of unsafe disposal practices?
15	15 - Do you realize that the issue of mediciation disposal is of immediate public health importance?
V	Improvement plan for safe disposal of used/expired medications
16	16 - How can we minimize or control the hazardous effects of unused or expired medicines?
17	17 - What measure do you suggest for consumer awaerness about proper drug disposal?
18	18 - Which of the following can be utilized most effectively in creating awareness among the community regarding proper drug disposal?
