# Supplementary material for: A cross-sectional study on perceptions towards safe disposal of unused/expired medicines and its associated factors among the public in Saudi Arabia—a threat to the environment and health
Source: PeerJ journal article supplement (doi:10.7717/peerj.19258), 2025-04-23
Supplement: Data_coding.xlsx [file Data_coding.xlsx]

## Sheet: Sheet1
1- Gender	2- Age in years	3- Marital status	4- Education	5 - Occupation	6 - Are there any unused medicines at your home?	7 - What might be the possible reasons for the availability of unused medicines at home?	8 - Do you know about the proper method for medication disposal?	9 - Which type of medicine did you dispose of recently?	10 - How do you dispose your unused or expired medicines?	11 - Do you think unused/expired medicines at home are potentially risks for the community?	12 - Do you think unsafe drug disposal practices pose a threat to our environment?	13 - Do you think there is lack of adequate information on safe disposal of unused and expired household medicines?	14 - Do you think public must be sensitized about the impact of unsafe disposal practices?	15 - Do you realize that the issue of mediciation disposal is of immediate public health importance?	16 - How can we minimize or control the hazardous effects of unused or expired medicines?	17 - What measure do you suggest for consumer awaerness about proper drug disposal?	18 - Which of the following can be utilized most effectively in creating awareness among the community regarding proper drug disposal?
1=Male	1=18-24	1=Single	1=illiterate	1=Self employed	1=yes	1=Medicine expired	1=yes	1=Oral antibiotics	1=Returning to pharmacist	2 = Positive	2 = Positive	2 = Positive	2 = Positive	2 = Positive	1=Providing proper guidance to the consumer	1=Awareness programs by the government	1 = HCP
2=Female	2=25-39	2=Married	2=Secondary	2=Student	2=no	2=Symptoms imporve and felt better	2=no	2=Pain relievers	2=Garbage	1 = Negative	1 = Negative	1 = Negative	1 = Negative	1 = Negative	2=Reducing the number of prescribed medications	2=Patient education by HCP	2 = Social media
	3=40-59		3=College	3=Govt employed		3=Doctor changed medication		3=Topical antibiotics	3=Sink						3=Prescribe in quantities and for duration that ensure patient compliance	3=Written instructions on medicines
	4=60 and above			4=Housewife		4=Changed to herbal medicines		4=Antihypertensives	4=Giving away to friends						4=Donating or sharing unused medication	4=Information via social media
				5=Others		5=Did nto feel helping condition		5= Anti diabetics	5=Others						5=Others
						6=Self discontiuation		6 = Others
						7=Experienced side effects
