# Supplementary material for: A cross-sectional study on perceptions towards safe disposal of unused/expired medicines and its associated factors among the public in Saudi Arabia—a threat to the environment and health
Source: PeerJ journal article supplement (doi:10.7717/peerj.19258), 2025-04-23
Supplement: Survey_Questionnaire_English.pdf [file Survey_Questionnaire_English.pdf]

# Survey on Pharmaceutical Waste Disposal

## Questionnaire (English version)

### I. Demographic characteristics

1. Gender
  - ☐ Male
  - ☐ Female
2. Age in years
  - ☐ 18-24
  - ☐ 25-39
  - ☐ 40-59
  - ☐ 60 and above
3. Marital status
  - ☐ Single
  - ☐ Married
4. Education
  - ☐ Illiterate
  - ☐ Secondary
  - ☐ College
5. Occupation
  - ☐ Self-employed
  - ☐ Student
  - ☐ Govt employed
  - ☐ Housewife
  - ☐ Others

### II. Presence of unused/expired medications

6. Are there any unused medicines at your home?
  - ☐ Yes
  - ☐ No
7. What might be the possible reasons for the availability of unused medicines at home??
  - ☐ Medicine expired
  - ☐ Symptoms improve and feel better
  - ☐ The doctor changed the medication
  - ☐ Changed to herbal medicines
  - ☐ Did not feel a helping condition
  - ☐ Self-discontinuation
  - ☐ Experienced side effects

8. Do you know about the proper methods for medication disposal?

- ☐ Yes
- ☐ No

9. Which type of medicine did you dispose of recently?

- ☐ Oral antibiotics
- ☐ Pain relievers
- ☐ Topical antibiotics
- ☐ Antihypertensives
- ☐ Antidiabetics
- ☐ Others

10. How do you dispose of your unused or expired medicines?

- ☐ Returning to pharmacist
- ☐ Garbage
- ☐ Sink
- ☐ Giving away to friends
- ☐ Others

### **III. Perception on safe disposal of unused/expired medicines**

11. Do you think unused/expired medicines at home are potentially risky for the community?

- ☐ Strongly agree
- ☐ Agree
- ☐ Disagree
- ☐ Strongly disagree

12. Do you think unsafe drug disposal practices pose a threat to our environment?

- ☐ Strongly agree
- ☐ Agree
- ☐ Disagree
- ☐ Strongly disagree

13. Do you think there is a lack of adequate information on safely disposing of unused and expired household medicines?

- ☐ Strongly agree
- ☐ Agree
- ☐ Disagree
- ☐ Strongly disagree

14. Do you think the public must be sensitized about the impact of unsafe disposal practices?

- ☐ Strongly agree
- ☐ Agree
- ☐ Disagree
- ☐ Strongly disagree

15. Do you realize that the issue of medication disposal is of immediate public health importance?

- ☐ Strongly agree
- ☐ Agree
- ☐ Disagree
- ☐ Strongly disagree

#### **IV. Improvement plan for safe disposal of used/expired medications**

16. How can we minimize or control the hazardous effects of unused or expired medicines?

- ☐ Providing proper guidance to the consumer
- ☐ Reducing the number of prescribed medications
- ☐ Prescribe in quantities and for the duration that ensures patient compliance
- ☐ Donating or sharing unused medication
- ☐ Others

17. What measure do you suggest for consumer awareness of proper drug disposal?

- ☐ Awareness programs by the government
- ☐ Patient education by HCP
- ☐ Written instructions on medicines
- ☐ Information via social media

18. Which of the following can be utilized most effectively in creating awareness among the community regarding the proper disposal of drugs?

- ☐ Electronic media (Facebook and Twitter)
- ☐ Treating physician
- ☐ Chemist
- ☐ Nurse
- ☐ Newspaper
- ☐ Others
